# Supplementary material for: Polymorphisms of SLCO1B1 rs4149056 and SLC22A1 rs2282143 are associated with responsiveness to acitretin in psoriasis patients
Source: PubMed Central journal article supplement (PMC6123456; doi:10.1038/s41598-018-31352-2), 2018-09-04
Supplement: 41598_2018_31352_MOESM1_ESM.pdf [file 41598_2018_31352_MOESM1_ESM.pdf]

**Polymorphisms of *SLCO1B1* rs4149056 and *SLC22A1* rs2282143 are associated with responsiveness to acitretin in psoriasis patients**

Wangqing Chen<sup>1,2,3</sup>, Xu Zhang<sup>1,3</sup>, Wei Zhang<sup>2</sup>, Cong Peng<sup>1,3</sup>, Wu Zhu<sup>\*1,3</sup>,  
Xiang Chen<sup>\*1,2,3</sup>

1. Department of Clinical Pharmacology, Xiangya Hospital, Central South University, ChangSha, Hunan, 410008, China

2. Department of Dermatology, Xiangya Hospital, Central South University, Changsha, Hunan, 410008, China

3. Hunan Key Laboratory of Skin Cancer and Psoriasis, ChangSha, Hunan, 410008, China

Corresponding author: Xiang Chen and Wu Zhu

Address: Xiangya Road No.87, Xiangya Hospital, Changsha City, Hunan Province, 410008, China; E-mail: chenxiangek@126.com; or zhuwu70@hotmail.com

The word counts for the abstract (188), text (3970), number of references (33), tables (3), Figures (4), Supplementary Tables (4), Supplementary Figures (3).

**Funding:**

This project was supported by The Special Foundation for State Major Basic Research Program of China (No. 81430075) and the National Natural Science Foundation of China (No. 81573049 and 81773329).

**Conflicts of interest**

All the authors confirmed that there were no conflicts of interest.

Patient 1

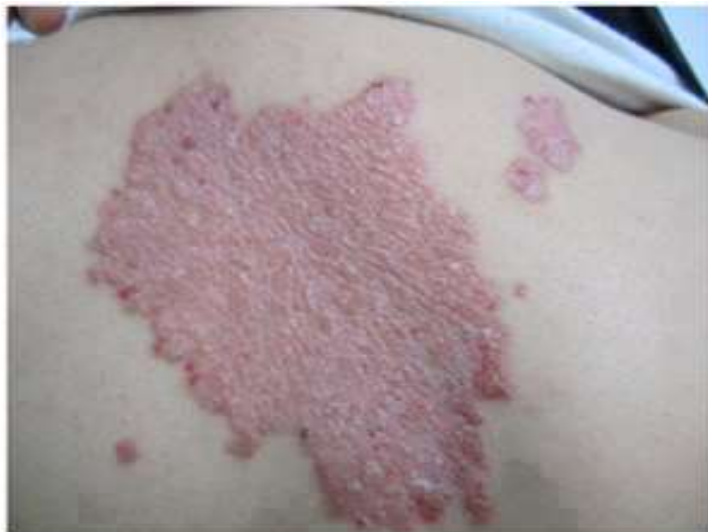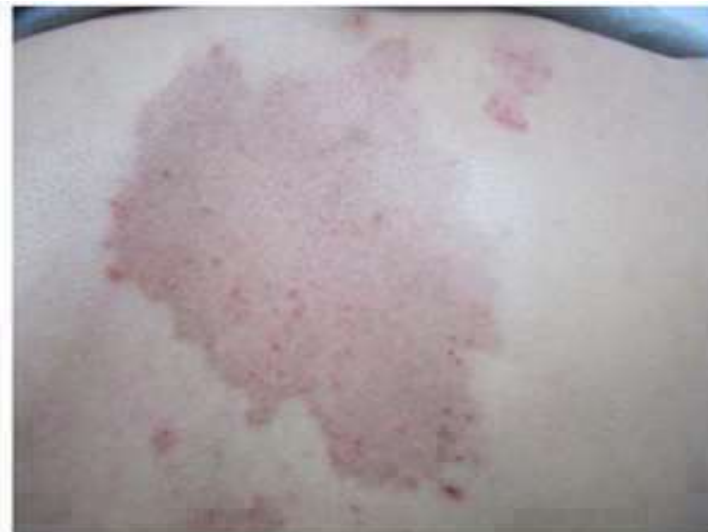

Patient 2

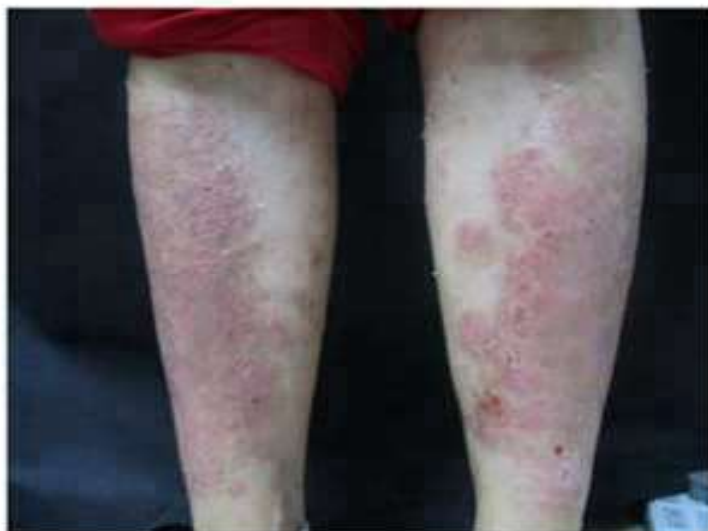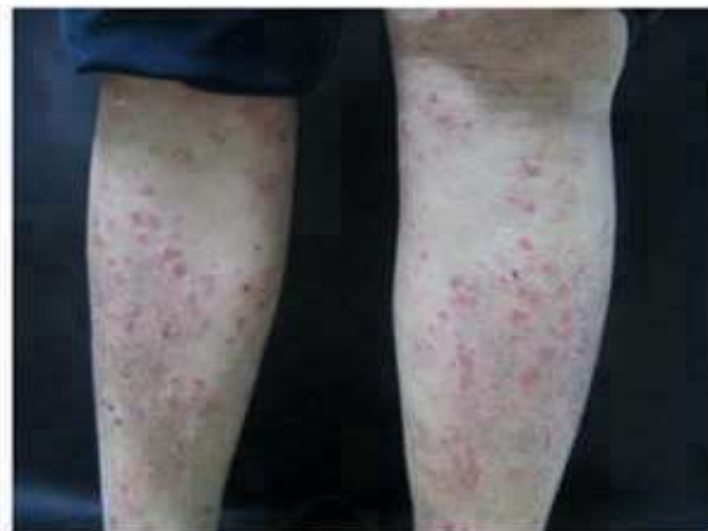

Patient 3

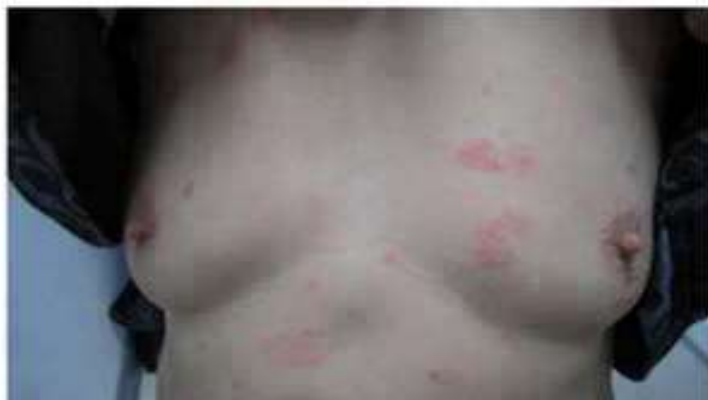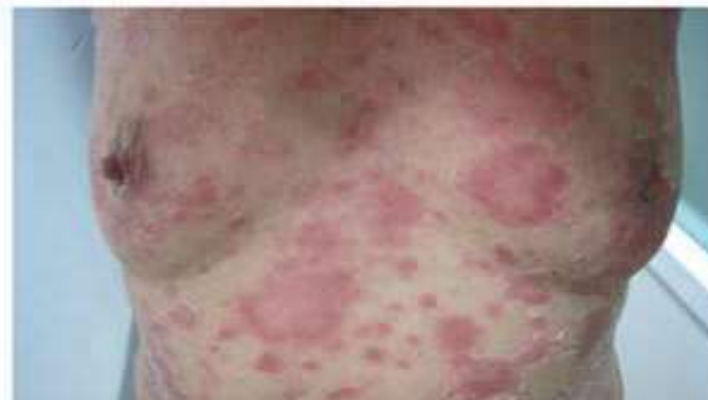

**cell proliferation inhibition rate**

1.0  
0.5  
0.0  
-0.5

50000  
40000  
20000  
10000  
5000  
4000  
2000  
1000  
500  
200  
0

**Acitretin incubation concentration(ng/ml)**

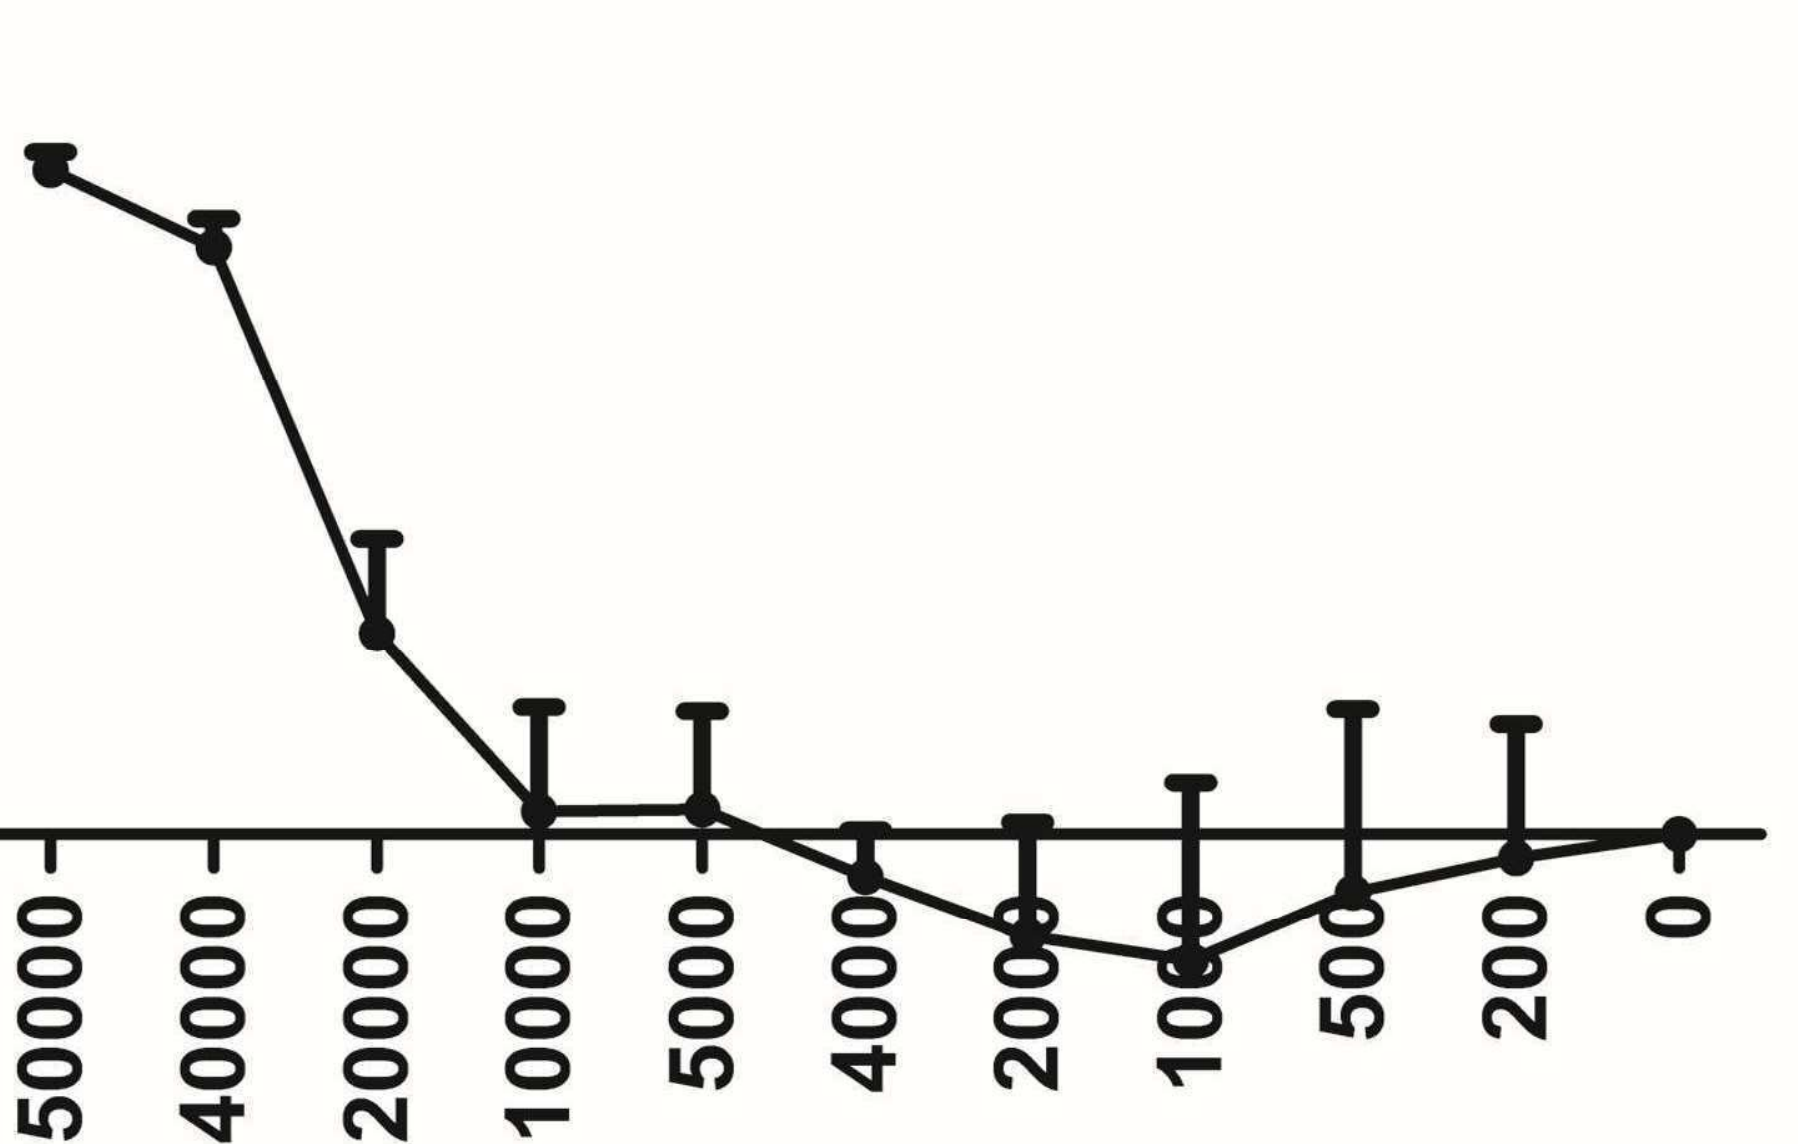

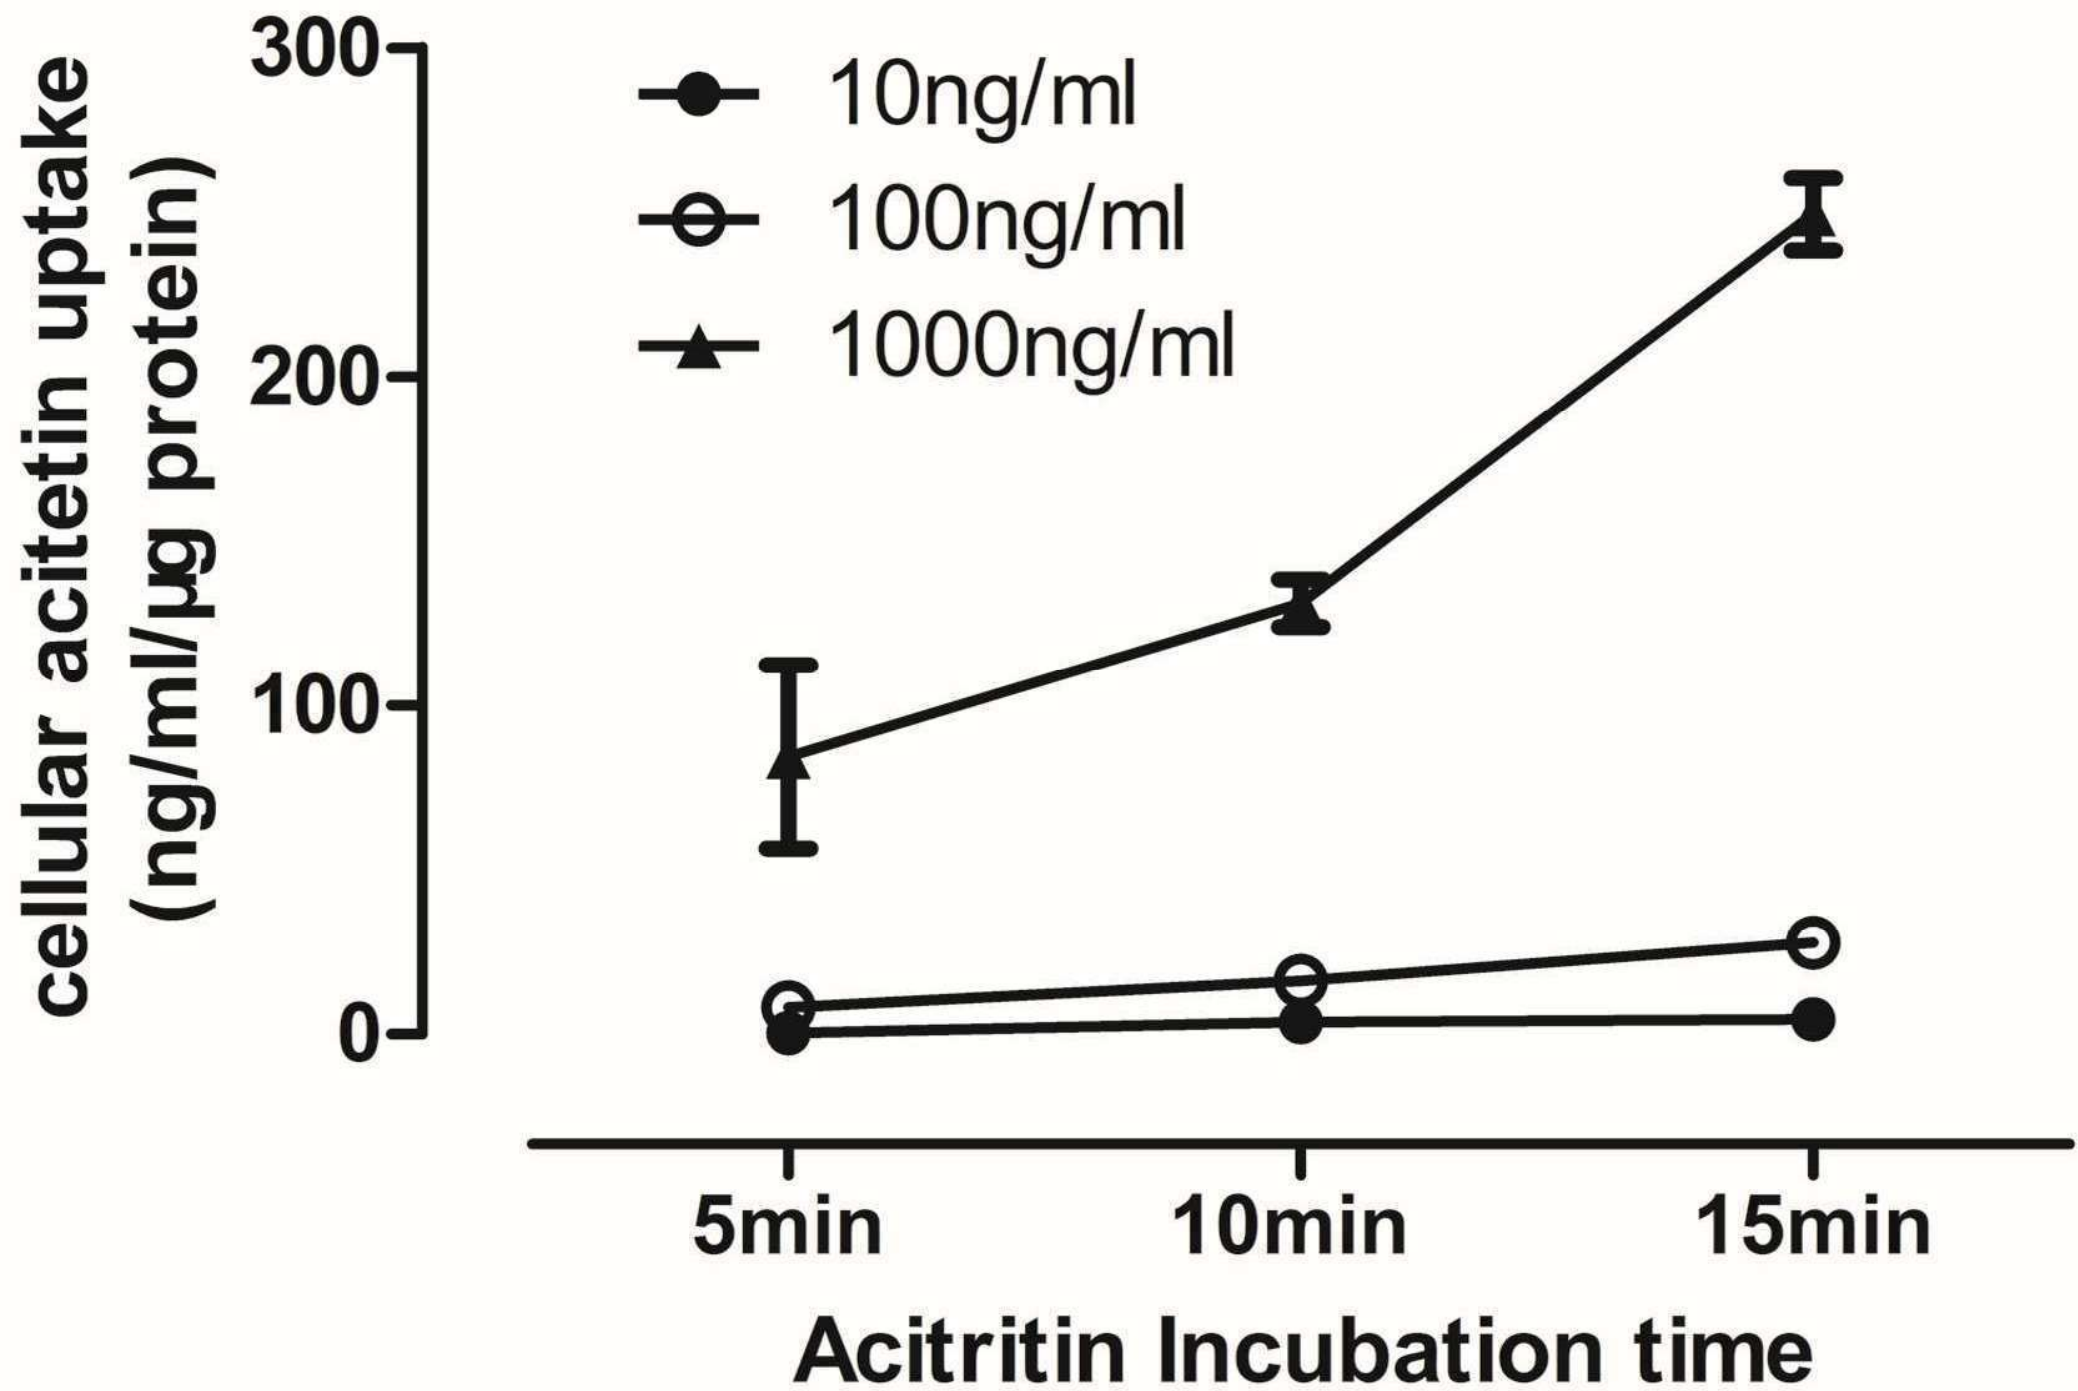

## **Legends of Supplementary Figures**

**Supplementary Figure S1.** Efficacy of acitretin varied in psoriasis patients

Legends: All patients were treated with acitretin 30 mg/day plus calcipotriol ointment. With treatment for 8 weeks, patient 1 was classed as a responder with PASI improvement >50%, and patient 2 was classed as a non-responder with PASI improvement <50%. Patient 3 was classed as a non-responder, with markedly increased disease severity after 1-week treatment with acitretin.

**Supplementary Figure S2.** The effect of different acitretin concentration incubation on HEK293 cells proliferation.

Legends: With acitretin concentration no more than 200 ng/ml, there was no significant influence on cell proliferation. While, when the concentration was up to 500 ng/ml, there were notable changes in cell proliferation.

**Supplementary Figure S3.** Incubation time 15min for acitretin uptake

Legends: As the incubation time increased, cellular acitretin uptake was saturated at 10 min with a concentration of 10 or 100 ng/ml. When acitretin concentration reached 1000 ng/ml, the uptake capability was still increasing at 15 min.

| Supplement Table 1. The SNPs list of vera code adme core panel |             |              |                   |                         |            |
|----------------------------------------------------------------|-------------|--------------|-------------------|-------------------------|------------|
| Assay                                                          | Gene Symbol | PrimaryName  | Nucleotide Change | Effect                  | RefSeq ID  |
| 1                                                              | ABCB1       | 1236C>T      | c.1236C>T         | -                       | rs1128503  |
| 2                                                              | ABCB1       | -129 T>C)    | c.-129C>T         | -                       | rs3213619  |
| 3                                                              | ABCB1       | 2677nt G>T>A | c.2677G>T>A       | -                       | rs2032582  |
| 4                                                              | ABCB1       | C3435ntT     | c.3435C>T         | -                       | rs1045642  |
| 5                                                              | ABCC2       | -24C>T       | c.-24C>T          | -                       | rs717620   |
| 6                                                              | ABCC2       | A1450T       | c.4348G>A         | p.A1450T                | rs56296335 |
| 7                                                              | ABCC2       | I1324I       | c.3972C>T         | p.I1324I                | rs3740066  |
| 8                                                              | ABCC2       | R768W        | c.2302C>T         | p.R768W                 | rs56199535 |
| 9                                                              | ABCC2       | S789F        | c.2366C>T         | p.S789F                 | rs56220353 |
| 10                                                             | ABCC2       | V417I        | c.1249G>A         | p.V417I                 | rs2273697  |
| 11                                                             | ABCG2       | 421nt C>A    | c.421C>A          | p.Q141K                 | rs2231142  |
| 12                                                             | ABCG2       | Q126X        | c.376C>T          | p.Q126X                 | rs72552713 |
| 13                                                             | CYP1A1      | *2 (I462V)   | 2455A>G           | p.I462V                 | rs1048943  |
| 14                                                             | CYP1A1      | *3           | 3205T>C           | -                       | rs1800031  |
| 15                                                             | CYP1A1      | *4           | 2453C>A           | p.T461N                 | rs1799814  |
| 16                                                             | CYP1A1      | *5           | 2461C>A           | p.R464S                 | rs41279188 |
| 17                                                             | CYP1A1      | *6           | 1636G>T           | p.M331I                 | rs56313657 |
| 18                                                             | CYP1A1      | *7           | 2346-2347insT     | Frameshift              | rs72547510 |
| 19                                                             | CYP1A1      | *8           | 2414T>A           | p.I448N                 | rs72547509 |
| 20                                                             | CYP1A2      | *1C          | -3860G>A          | -                       | rs2069514  |
| 21                                                             | CYP1A2      | *1F          | -163C>A           | -                       | rs762551   |
| 22                                                             | CYP1A2      | *1K          | -729C>T           | -                       | rs12720461 |
| 23                                                             | CYP1A2      | *7           | 3533G>A           | Splicing defect         | rs56107638 |
| 24                                                             | CYP2A6      | *11          | c.670T>C          | p.S224P                 | rs28399447 |
| 25                                                             | CYP2A6      | *17          | c.1093G>A         | p.V365M                 | rs28399454 |
| 26                                                             | CYP2A6      | *1B          | -                 | -                       | -          |
| 27                                                             | CYP2A6      | *2           | c.479T>A          | p.L160H                 | rs1801272  |
| 28                                                             | CYP2A6      | *20          | c.587-588delAA    | Frameshift              | rs28399444 |
| 29                                                             | CYP2A6      | *4           |                   |                         | NA         |
| 30                                                             | CYP2A6      | *6           | c.383G>A          | p.R128Q                 | rs4986891  |
| 31                                                             | CYP2A6      | *7           | c.1412T>C         | p.I471T                 | rs5031016  |
| 32                                                             | CYP2A6      | *8           | c.1454G>T         | p.R485L                 | rs28399468 |
| 33                                                             | CYP2A6      | *9           | g.-48T>G          | TATA box                | rs28399433 |
| 34                                                             | CYP2B6      | *16          | c.983T>C          | p.I328T                 | rs28399499 |
| 35                                                             | CYP2B6      | *2           | c.64C>T           | p.R22C                  | rs8192709  |
| 36                                                             | CYP2B6      | *28          | c.1132C>T         | p.R378X                 | rs34097093 |
| 37                                                             | CYP2B6      | *8           | c.415A>G          | p.K139E                 | rs12721655 |
| 38                                                             | CYP2B6      | *9 (*6)      | c.516G>T          | p.Q172H                 | rs3745274  |
| 39                                                             | CYP2C19     | *12          | c.1473A>C         | p.X491C; 26<br>extra AA | rs55640102 |
| 40                                                             | CYP2C19     | *17          | g.-806C>T         | -                       | rs12248560 |

|    |         |     |                        |                 |            |
|----|---------|-----|------------------------|-----------------|------------|
| 41 | CYP2C19 | *2  | c.681G>A               | Splicing defect | rs4244285  |
| 42 | CYP2C19 | *3  | c.636G>A               | p.W212X         | rs4986893  |
| 43 | CYP2C19 | *4  | c.1A>G                 | GTG start codon | rs28399504 |
| 44 | CYP2C19 | *5  | c.1297C>T              | p.R433W         | rs56337013 |
| 45 | CYP2C19 | *6  | c.395G>A               | p.R132Q         | rs72552267 |
| 46 | CYP2C19 | *7  | g.19294T>A             | Splicing defect | rs72558186 |
| 47 | CYP2C19 | *8  | c.358T>C               | p.W120R         | rs41291556 |
| 48 | CYP2C8  | *2  | c.805A>T               | p.I269F         | rs11572103 |
| 49 | CYP2C8  | *3  | c.1196A>G              | p.K399R         | rs10509681 |
| 50 | CYP2C8  | *4  | c.792C>G               | p.I264M         | rs1058930  |
| 51 | CYP2C8  | *5  | c.475delA              | Frameshift      | rs72558197 |
| 52 | CYP2C8  | *7  | c.556C>T               | p.R186X         | rs72558195 |
| 53 | CYP2C8  | *8  | c.556C>G               | p.R186G         | rs72558195 |
| 54 | CYP2C9  | *10 | c.815A>G               | p.E272G         | rs9332130  |
| 55 | CYP2C9  | *11 | c.1003C>T              | p.R335W         | rs28371685 |
| 56 | CYP2C9  | *12 | c.1465C>T              | p.P489S         | rs9332239  |
| 57 | CYP2C9  | *13 | c.269T>C               | p.L90P          | rs74052158 |
| 58 | CYP2C9  | *15 | c.485C>A               | p.S162X         | rs72558190 |
| 59 | CYP2C9  | *2  | c.430C>T               | p.R144C         | rs1799853  |
| 60 | CYP2C9  | *25 | c.353-362delAGAAATGGAA | Frameshift      | rs72558188 |
| 61 | CYP2C9  | *3  | c.1075A>C              | p.I359L         | rs1057910  |
| 62 | CYP2C9  | *4  | c.1076T>C              | p.I359T         | rs56165452 |
| 63 | CYP2C9  | *5  | c.1080C>G              | p.D360E         | rs28371686 |
| 64 | CYP2C9  | *6  | 818delA (cDNA)         | Frameshift      | rs9332131  |
| 65 | CYP2C9  | *8  | c.449G>A               | p.R150H         | rs7900194  |
| 66 | CYP2C9  | *9  | c.752A>G               | p.H251R         | rs2256871  |
| 67 | CYP2D6  | *10 | 100C>T                 | p.P34S          | rs1065852  |
| 68 | CYP2D6  | *11 | 883G>C                 | Splicing defect | rs5030863  |
| 69 | CYP2D6  | *12 | 124G>A                 | p.G42R          | rs5030862  |
| 70 | CYP2D6  | *14 | 1758G>A                | p.G169R         | rs5030865  |
| 71 | CYP2D6  | *15 | 137-138insT            | Frameshift      | rs72549357 |
| 72 | CYP2D6  | *17 | 1023C>T                | p.T107I         | rs28371706 |
| 73 | CYP2D6  | *18 | 4125-4133insGTGCCCACT  | p.468-470dupVPT | NA         |
| 74 | CYP2D6  | *19 | 2539-2542delAACT       | Frameshift      | rs72549353 |
| 75 | CYP2D6  | *20 | 1973-1974insG          | Frameshift      | rs72549354 |
| 76 | CYP2D6  | *21 | 2573-2574insC          | Frameshift      | rs72549352 |
| 77 | CYP2D6  | *2a | -1584C>G               |                 | rs1080985  |
| 78 | CYP2D6  | *3  | 2549delA               | Frameshift      | rs35742686 |
| 79 | CYP2D6  | *38 | 2587-2590delGACT       | Frameshift      | rs72549351 |
| 80 | CYP2D6  | *4  | 1846G>A                | Splicing defect | rs3892097  |

|     |        |                |                  |                 |            |
|-----|--------|----------------|------------------|-----------------|------------|
| 81  | CYP2D6 | *41            | 2988G>A          | Splicing defect | rs28371725 |
| 82  | CYP2D6 | *42            | 3259-3260insGT   | Frameshift      | rs72549346 |
| 83  | CYP2D6 | *44            | 2950G>C          | Splicing defect | rs72549349 |
| 84  | CYP2D6 | *5             |                  |                 | NA         |
| 85  | CYP2D6 | *56            | 3201C>T          | p.R344X         | rs72549347 |
| 86  | CYP2D6 | *6             | 1707delT         | Frameshift      | rs5030655  |
| 87  | CYP2D6 | *7             | 2935A>C          | p.H324P         | rs5030867  |
| 88  | CYP2D6 | *8             | 1758G>T          | p.G169X         | rs5030865  |
| 89  | CYP2D6 | *9             | 2615-2617delAAG  | p.K281del       | rs5030656  |
| 90  | CYP2E1 | *2             | 1132G>A          | p.R76H          | rs72559710 |
| 91  | CYP3A4 | *1G            | IVS10+12G>A      | -               | rs2242480  |
| 92  | CYP3A4 | *2             | c.664T>C         | p.S222P         | rs55785340 |
| 93  | CYP3A4 | *20            | c.1461-1462insA  | Frameshift      | rs67666821 |
| 94  | CYP3A4 | *6             | c.830-831insA    | Frameshift      | rs4646438  |
| 95  | CYP3A5 | *10(F446S)     | 29753T>C         | c.F446S         | rs41279854 |
| 96  | CYP3A5 | *3             | 6986A>G          | Splicing defect | rs776746   |
| 97  | CYP3A5 | *5             | 12952T>C         | Splicing defect | rs55965422 |
| 98  | CYP3A5 | *6             | 14690G>A         | Splicing defect | rs10264272 |
| 99  | CYP3A5 | *7             | 27131-27132insT  | Frameshift      | rs41303343 |
| 100 | DPYD   | *10            | c.2983G>T        | p.V995F         | rs1801268  |
| 101 | DPYD   | *2A            | IVS14+1G>A       | -               | rs3918290  |
| 102 | DPYD   | *7             | c.295-298delTCAT | -               | rs72549309 |
| 103 | DPYD   | *8             | -                | p.R235W         | rs1801266  |
| 104 | DPYD   | *9A            | c.85T>C          | p.C29R          | rs1801265  |
| 105 | DPYD   | *9B            | c.2657G>A        | p.R886H         | rs1801267  |
| 106 | GSTM1  | *B             | c.519G>C         | p.K172N         | rs1065411  |
| 107 | GSTM1  | CNV            | -                | -               | -          |
| 108 | GSTP1  | *A_*B_*C_*D    | c.313A>G         | p.I105V         | rs1695     |
| 109 | GSTP1  | *A_*B_*C_*D    | c.341C>T         | p.A114V         | rs1138272  |
| 110 | GSTT1  | CNV            | -                | -               | -          |
| 111 | NAT1   | *11            | c.-344C>T        | -               | rs4986988  |
| 112 | NAT1   | *11            | c.-40A>T         | -               | rs4986989  |
| 113 | NAT1   | *11            | c.445G>A         | p.V149I         | rs4987076  |
| 114 | NAT1   | *11            | c.459G>A         | p.T153T         | rs4986990  |
| 115 | NAT1   | *11            | c.640T>G         | p.S214A         | rs4986783  |
| 116 | NAT1   | *14            | c.560G>A         | p.R187Q         | rs4986782  |
| 117 | NAT1   | *15            | c.559C>T         | p.R187X         | rs5030839  |
| 118 | NAT1   | *17            | c.190C>T         | p.R64W          | rs56379106 |
| 119 | NAT1   | *19            | c.97C>T          | p.R33X          | rs56318881 |
| 120 | NAT1   | *22            | c.752A>T         | p.D251V         | rs56172717 |
| 121 | NAT1   | *5(350-351G>C) | c.350-351GG>CC   | p.R117T         | rs72554606 |



|     |         |                |                   |                   |                                          |
|-----|---------|----------------|-------------------|-------------------|------------------------------------------|
| 122 | NAT1    | *5(497-499G>C) | c.497-499GGG>CCC  | p.R166T;<br>E167Q | rs72554608                               |
| 123 | NAT1    | *5(884A>G)     | c.884A>G          | -                 | rs55793712                               |
| 124 | NAT1    | *5(976delA)    | c.976delA         | -                 | rs72554612                               |
| 125 | NAT2    | *11            | c.481C>T          | p.L161L           | rs1799929                                |
| 126 | NAT2    | *12            | c.803A>G          | p.K268R           | rs1208                                   |
| 127 | NAT2    | *13            | c.282C>T          | p.Y94Y            | rs1041983                                |
| 128 | NAT2    | *14            | c.191G>A          | p.R64Q            | rs1801279                                |
| 129 | NAT2    | *19            | c.190C>T          | p.R64W            | rs1805158                                |
| 130 | NAT2    | *5             | c.341T>C          | p.I114T           | rs1801280                                |
| 131 | NAT2    | *6             | c.590G>A          | p.R197Q           | rs1799930                                |
| 132 | NAT2    | *7             | c.857G>A          | p.G286E           | rs1799931                                |
| 133 | SLC15A2 | A284A          | c.852G>A          | p.A284A           | rs2293616                                |
| 134 | SLC15A2 | L350F          | c.1048C>T         | p.L350F           | rs2257212                                |
| 135 | SLC15A2 | P409S          | c.1225C>T         | p.P409S           | rs1143671                                |
| 136 | SLC15A2 | R509K          | c.1526G>A         | p.R509K           | rs1143672                                |
| 137 | SLC22A1 | 420del         | c.1258-1260delATG | p.M420del         | rs35167514;<br>rs34305973;<br>rs35191146 |
| 138 | SLC22A1 | C88R           | c.262T>C          | p.C88R            | rs55918055                               |
| 139 | SLC22A1 | G220V          | c.659G>T          | p.G220V           | rs36103319                               |
| 140 | SLC22A1 | G401S          | c.1201G>A         | p.G401S           | rs34130495                               |
| 141 | SLC22A1 | G465R          | c.1393G>A         | p.G465R           | rs34059508                               |
| 142 | SLC22A1 | M408V          | c.1222A>G         | p.M408V           | rs628031                                 |
| 143 | SLC22A1 | P283L          | c.848C>T          | p.P283L           | rs4646277                                |
| 144 | SLC22A1 | P341L          | c.1022C>T         | p.P341L           | rs2282143                                |
| 145 | SLC22A1 | R287G          | c.859C>G          | p.R287G           | rs4646278                                |
| 146 | SLC22A1 | R61C           | c.181C>T          | p.R61C            | rs12208357                               |
| 147 | SLC22A2 | K432Q          | c.1294A>C         | p.K432Q           | rs8177517                                |
| 148 | SLC22A2 | M165I          | c.495G>A          | p.M165I           | rs8177507                                |
| 149 | SLC22A2 | P54S           | c.160C>T          | p.P54S            | rs8177504                                |
| 150 | SLC22A2 | R400C (*7.1)   | c.1198C>T         | p.R400C           | rs8177516                                |
| 151 | SLC22A2 | S270A (*4.1)   | c.808G>T          | p.S270A           | rs316019                                 |
| 152 | SLC22A6 | R50H           | c.149G>A          | p.R50H            | rs11568626                               |
| 153 | SLCO1B1 | *10            | c.1964A>G         | p.D655G           | rs56199088                               |
| 154 | SLCO1B1 | *11            | c.2000A>G         | p.E667G           | rs55737008                               |
| 155 | SLCO1B1 | *12            |                   |                   |                                          |
| 156 | SLCO1B1 | *13            |                   |                   |                                          |
| 157 | SLCO1B1 | *1B            | c.388G>A          | p.N130D           | rs2306283                                |
| 158 | SLCO1B1 | *2             | c.217T>C          | p.F73L            | rs56101265                               |
| 159 | SLCO1B1 | *3(E156G)      | c.467A>G          | p.E156G           | rs72559745                               |
| 160 | SLCO1B1 | *3(V82A)       | c.245T>C          | p.V82A            | rs56061388                               |
| 161 | SLCO1B1 | *5             | c.521T>C          | p.V174A           | rs4149056                                |

|     |         |                |           |         |            |
|-----|---------|----------------|-----------|---------|------------|
| 162 | SLCO1B1 | *6             | c.1058T>C | p.I353T | rs55901008 |
| 163 | SLCO1B1 | *9             | c.1463G>C | p.G488A | rs59502379 |
| 164 | SLCO2B1 | *3             | c.1457C>T | p.S486F | rs2306168  |
| 165 | SLCO1B3 | M233I          | c.699G>A  | p.M233I | rs7311358  |
| 166 | SLCO1B3 | S112A          | c.334T>G  | p.S112A | rs4149117  |
| 167 | SULT1A1 | *2             | c.638G>A  | p.R213H | rs9282861  |
| 168 | SULT1A1 | *3(M223V)      | c.667G>A  | p.V223M | rs1801030  |
| 169 | SULT1A1 | *4(R37Q)       |           | p.R37Q  | rs72547527 |
| 170 | SULT1A1 | Null(deletion) |           |         | NA         |
| 171 | TPMT    | *2             | c.238G>C  | p.A80P  | rs1800462  |
| 172 | TPMT    | *3a            |           |         |            |
| 173 | TPMT    | *3b            | c.460G>A  | p.A154T | rs1800460  |
| 174 | TPMT    | *3c            | c.719A>G  | p.Y240C | rs1142345  |
| 175 | TPMT    | *8             | c.644G>A  | p.R215H | rs56161402 |
| 176 | UGT1A1  | *27            | c.686C>A  | p.P229Q | rs35350960 |
| 177 | UGT1A1  | *29            | c.1099C>G | p.R367G | rs55750087 |
| 178 | UGT1A1  | *6             | c.211G>A  | p.G71R  | rs4148323  |
| 179 | UGT1A1  | *60            | -3279T>G  | -       | rs4124874  |
| 180 | UGT1A1  | *7             | c.1456T>G | p.Y486D | rs34993780 |
| 181 | UGT2B15 | *2             | c.253G>T  | p.D85Y  | rs1902023  |
| 182 | UGT2B17 | CNV            |           |         | NA         |
| 183 | UGT2B7  | *2             | c.802T>C  | p.H268Y | rs7439366  |
| 184 | VKORC1  | -1639G>A       | -1639G>A  | -       | rs9923231  |

Supplement Table 2. The demographic data and PASI of the patients in two phases

| Phase/<br>Genotype    | Effective Group        | Age         |         | BMI        |         | PASI baseline |         |
|-----------------------|------------------------|-------------|---------|------------|---------|---------------|---------|
|                       |                        | Value       | P value | Value      | P value | Value         | P value |
| Discovery<br>phase    | PASI<50(23)            | 45.35±14.06 | 0.066   | 23.11±3.90 | 0.936   | 10.41±7.08    | 0.477   |
|                       | PASI>50(23)            | 36.95±16.03 |         | 23.18±2.29 |         | 12.08±8.57    |         |
| Verification<br>phase | PASI<50(57)            | 42.45±14.00 | **0.013 | 22.73±5.19 | 0.609   | 10.73±7.41    | 0.671   |
|                       | PASI>50(48)            | 35.30±15.67 |         | 22.32±2.49 |         | 11.28±6.21    |         |
|                       | SLCO1B1 rs4149056 TT   | 38.68±12.14 | 0.369   | 22.91±2.41 | 0.466   | 11.17±4.84    | 0.381   |
|                       | SLCO1B1 rs4149056TC+CC | 39.76±14.82 |         | 22.77±3.49 |         | 11.20±4.10    |         |
|                       | SLC22A1 rs2282143 CC   | 40.41±13.64 | 0.576   | 22.72±3.63 | 0.468   | 12.24±5.24    | 0.128   |
|                       | SLC22A1 rs2282143CT+TT | 40.39±11.25 |         | 22.90±2.52 |         | 10.23±4.12    |         |

Supplement Table 3. The polymorphisms of rs4149056T>C and rs2282143C>T frequencies in patients with PASI>10

| phases                 | SLC22A1 Rs2282143     |             |             |         |                            | SLCO1B1 Rs4149056 |                       |             |             |            |                           |       |
|------------------------|-----------------------|-------------|-------------|---------|----------------------------|-------------------|-----------------------|-------------|-------------|------------|---------------------------|-------|
|                        | Genotypes/<br>alleles | PASI<5<br>0 | PASI>5<br>0 | P value | OR[95CI]                   | HWE               | Genotype<br>s/alleles | PASI<<br>50 | PASI><br>50 | P<br>value | OR[95CI]                  | HW    |
| Discover<br>y Phase    | CC                    | 12          | 3           | P<0.001 | 40.000[3.57<br>9, 447.034] | 0.171             | TT                    | 12          | 6           | P=0.01     | 14.000[1.385,<br>141.485] | 0.354 |
|                        | CT+TT                 | 1           | 10          |         |                            |                   | TC                    | 1           | 7           |            |                           |       |
|                        | C                     | 25          | 16          | P=0.002 | 15.625[1.82<br>1,134.040]  |                   | T                     | 25          | 19          | P=0.02     | 9.211[1.043,81<br>.361]   |       |
| Verificati<br>on Phase | CC                    | 28          | 19          | P=0.012 | 5.404[1.328,<br>21.983]    | 0.311             | TT                    | 29          | 24          | P=0.11     | 3.625[0.669,<br>19.630]   | 0.584 |
|                        | CT+TT                 | 3           | 11          |         |                            |                   | TC                    | 2           | 6           |            |                           |       |
|                        | C                     | 59          | 49          | P=0.019 | 4.415[1.166,<br>16.720]    |                   | T                     | 60          | 54          | P=0.13     | 3.333[0.645,17<br>.218]   |       |
| Total<br>samples       | CC                    | 40          | 22          | P<0.001 | 9.545[2.907,<br>31.348]    | 0.118             | TT                    | 41          | 30          | P=0.00     | 5.922[1.549,<br>22.635]   | 0.345 |
|                        | CT+TT                 | 4           | 21          |         |                            |                   | TC+TT                 | 3           | 13          |            |                           |       |
|                        | C                     | 84          | 65          | P<0.001 | 6.785[2.220,<br>20.736]    |                   | T                     | 85          | 73          | P=0.00     | 5.046[1.384,<br>18.399]   |       |
|                        | T                     | 4           | 21          |         |                            |                   | C                     | 3           | 13          |            |                           |       |

Supplement Table 4. The haplotypes of rs2282143-rs4149056 polymorphisms distribution in response and non-response groups.

| Haplotypes<br>(rs2282143-rs4149056) | Response<br>(N, %) | Non-response<br>(N, %) | Sig.    |
|-------------------------------------|--------------------|------------------------|---------|
| CC-TT                               | 32(45.07%)         | 63(78.75%)             | P<0.001 |
| CT-TT/CC-CT                         | 21(29.58%)         | 14(17.5%)              |         |
| CT-CT                               | 18(25.35%)         | 3(3.75%)               |         |
| CC-TT/CT-TT/CC-CT<br>(<2 variants)  | 53(74.65%)         | 77(96.25%)             | P<0.001 |
| CT-CT                               | 18(25.35%)         | 3(3.75%)               |         |
